# Supplementary material for: eIF6 deficiency regulates gut microbiota, decreases systemic inflammation, and alleviates atherosclerosis
Source: PubMed Central journal article supplement (PMC11494895; doi:10.1128/msystems.00595-24), 2024-09-03
Supplement: msystems.00595-24-s0001.pdf [file msystems.00595-24-s0001.pdf]

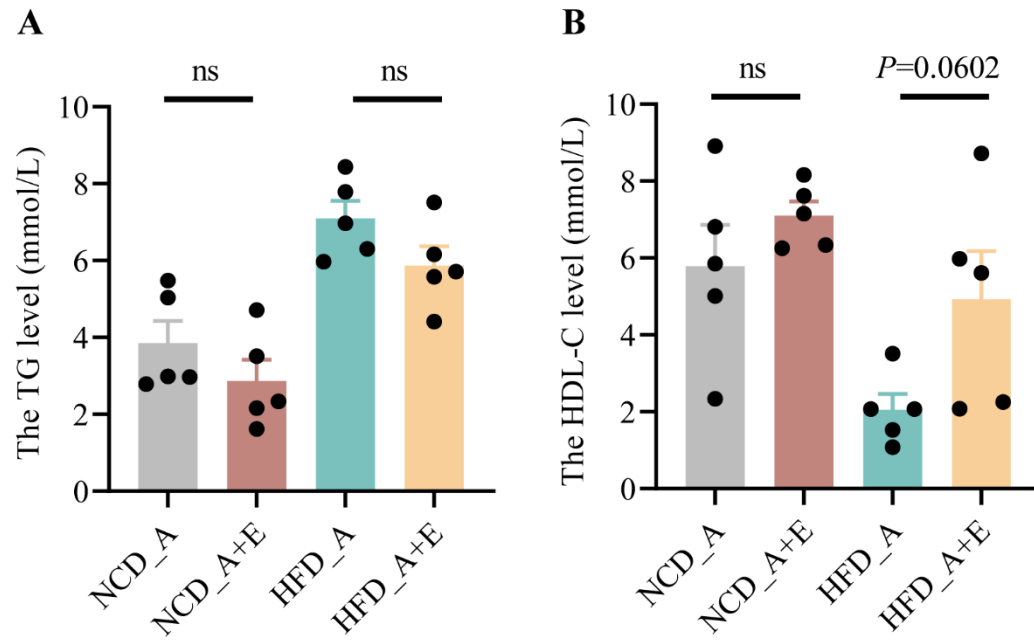

**Figure S1 *eIF6* deficiency reduced serum lipid metabolism.** (A) Serum total cholesterol (TC), (B) Serum high-density lipoprotein cholesterol (HDL-C). Datas are shown as the mean  $\pm$  SEM, \* $P < 0.05$ , \*\* $P < 0.01$ , \*\*\* $P < 0.01$  by one way ANOVA and Tukey post hoc. (NCD\_A, NCD\_ *ApoE*<sup>-/-</sup>, NCD\_A+E, NCD\_ *ApoE*<sup>-/-</sup>/*eIF6*<sup>+/-</sup>, HFD\_A, HFD\_ *ApoE*<sup>-/-</sup>, HFD\_A+E, HFD\_ *ApoE*<sup>-/-</sup>/*eIF6*<sup>+/-</sup>).

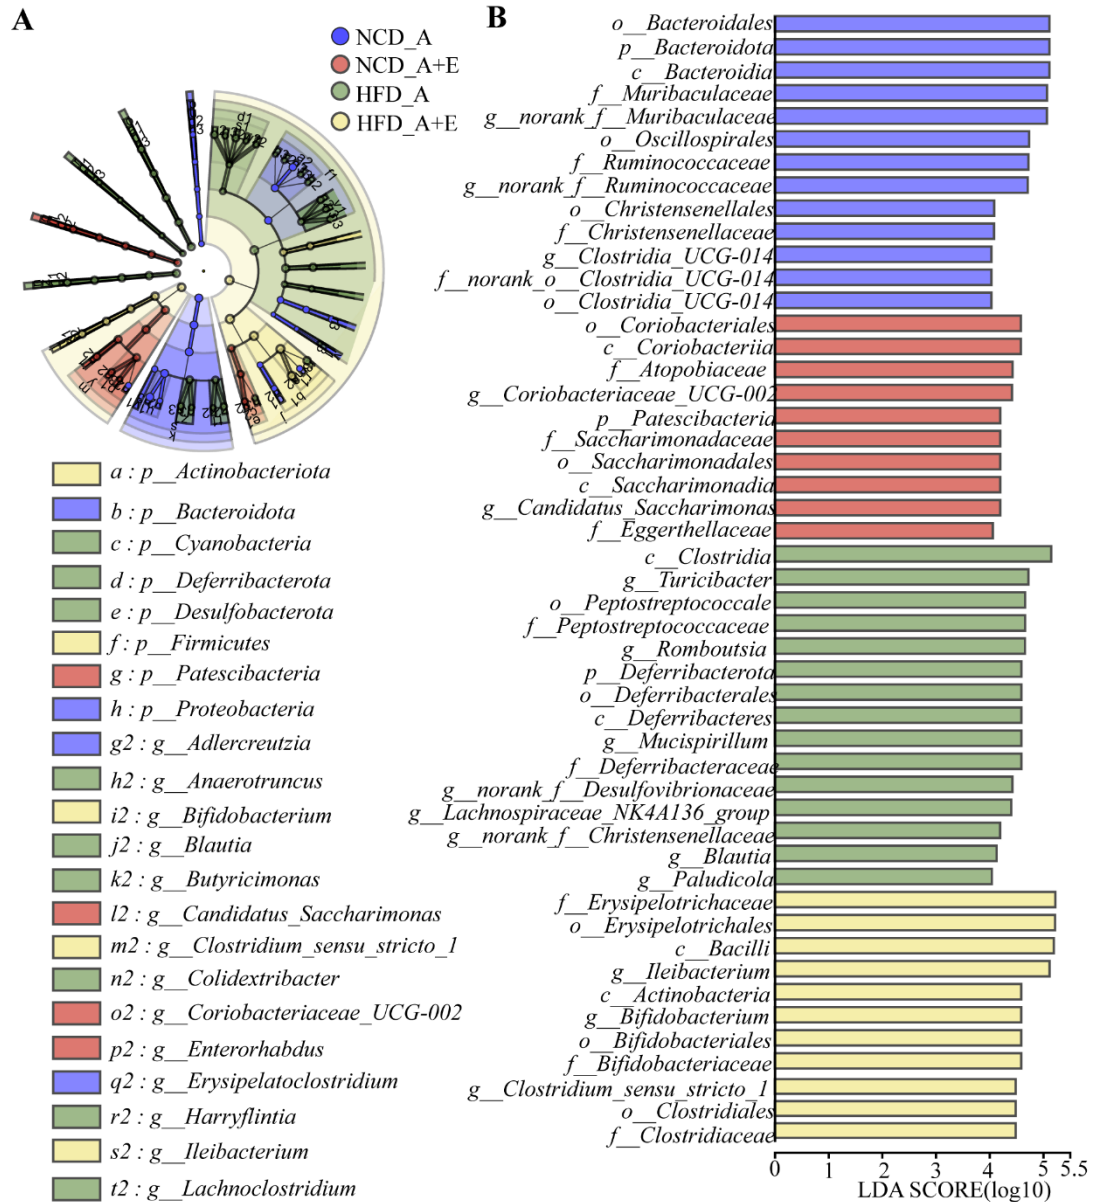

**Figure S2 Taxonomic cladogram obtained using LefSe analysis of the 16S rRNA sequences.** (A) Cladogram generated from linear discriminant analysis effect size (LefSe) showing the most differentially enriched bacterial taxa in the fecal microbiota of NCD\_A (blue), NCD\_A+E (red), HFD\_A (green), or HFD\_A+E (yellow) mice (LDA value= 4;  $P$  value< 0.05). (B) Computed LDA scores of the relative abundance difference among the NCD\_A (blue), NCD\_A+E (red), HFD\_A (green), or HFD\_A+E (yellow) mice.
