# Supplementary material for: eIF6 deficiency regulates gut microbiota, decreases systemic inflammation, and alleviates atherosclerosis
Source: PubMed Central journal article supplement (PMC11494895; doi:10.1128/msystems.00595-24), 2024-09-03

# Claudin-1

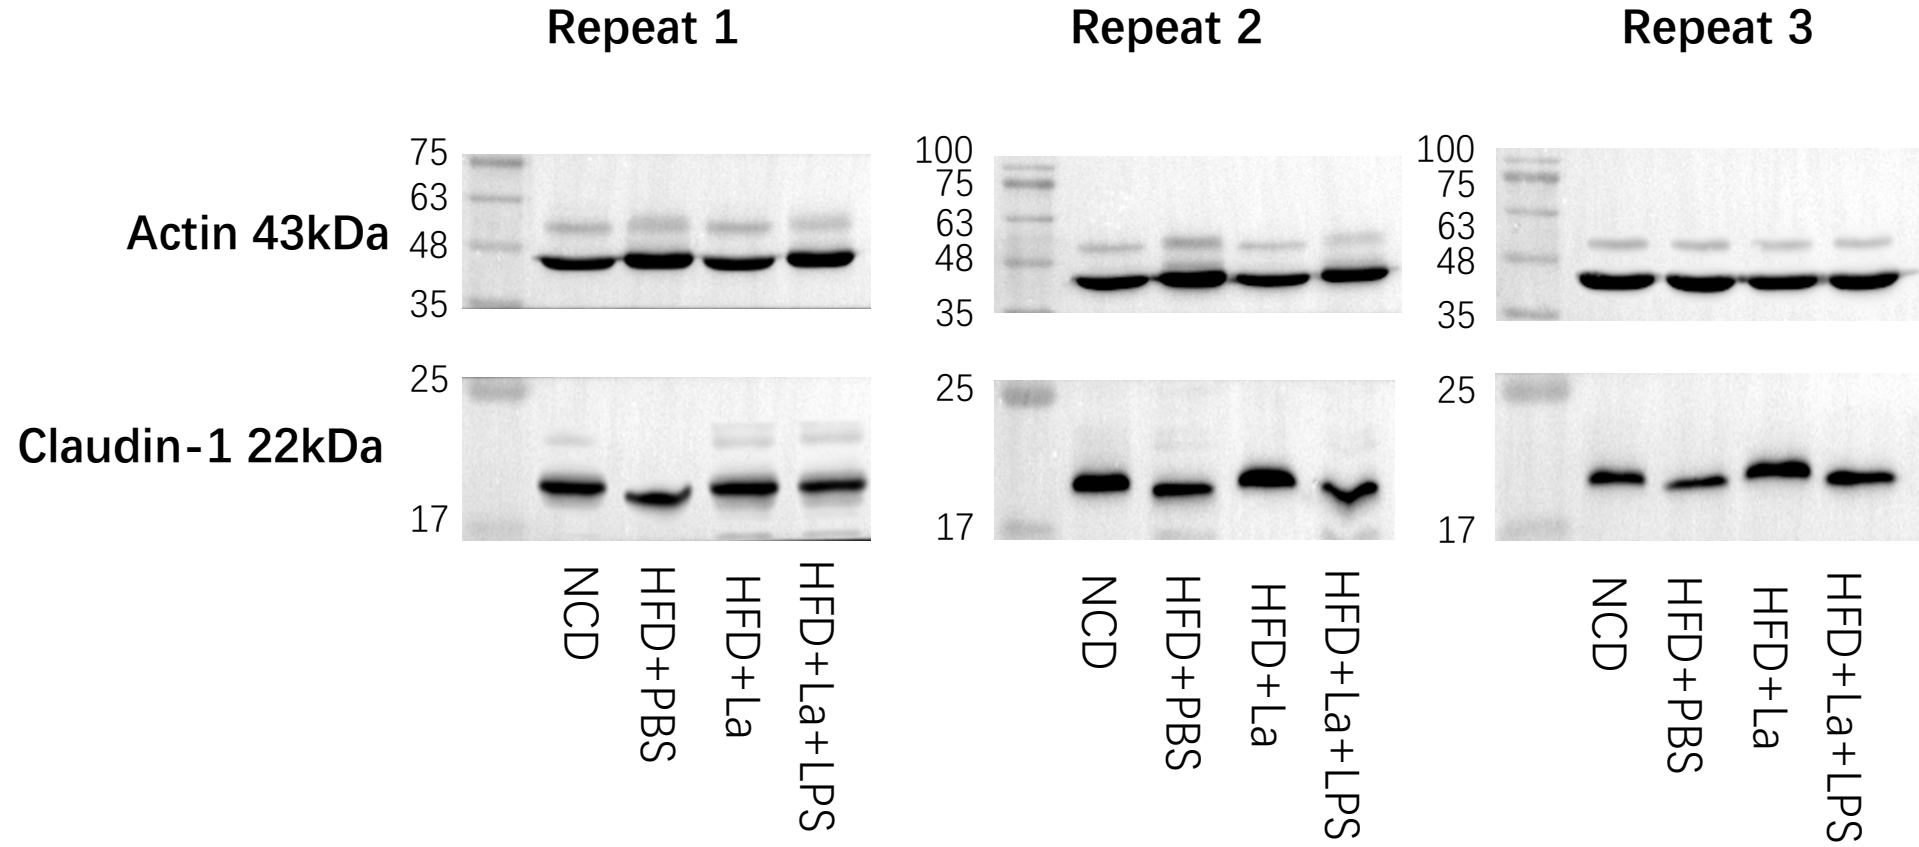

# Zo-1

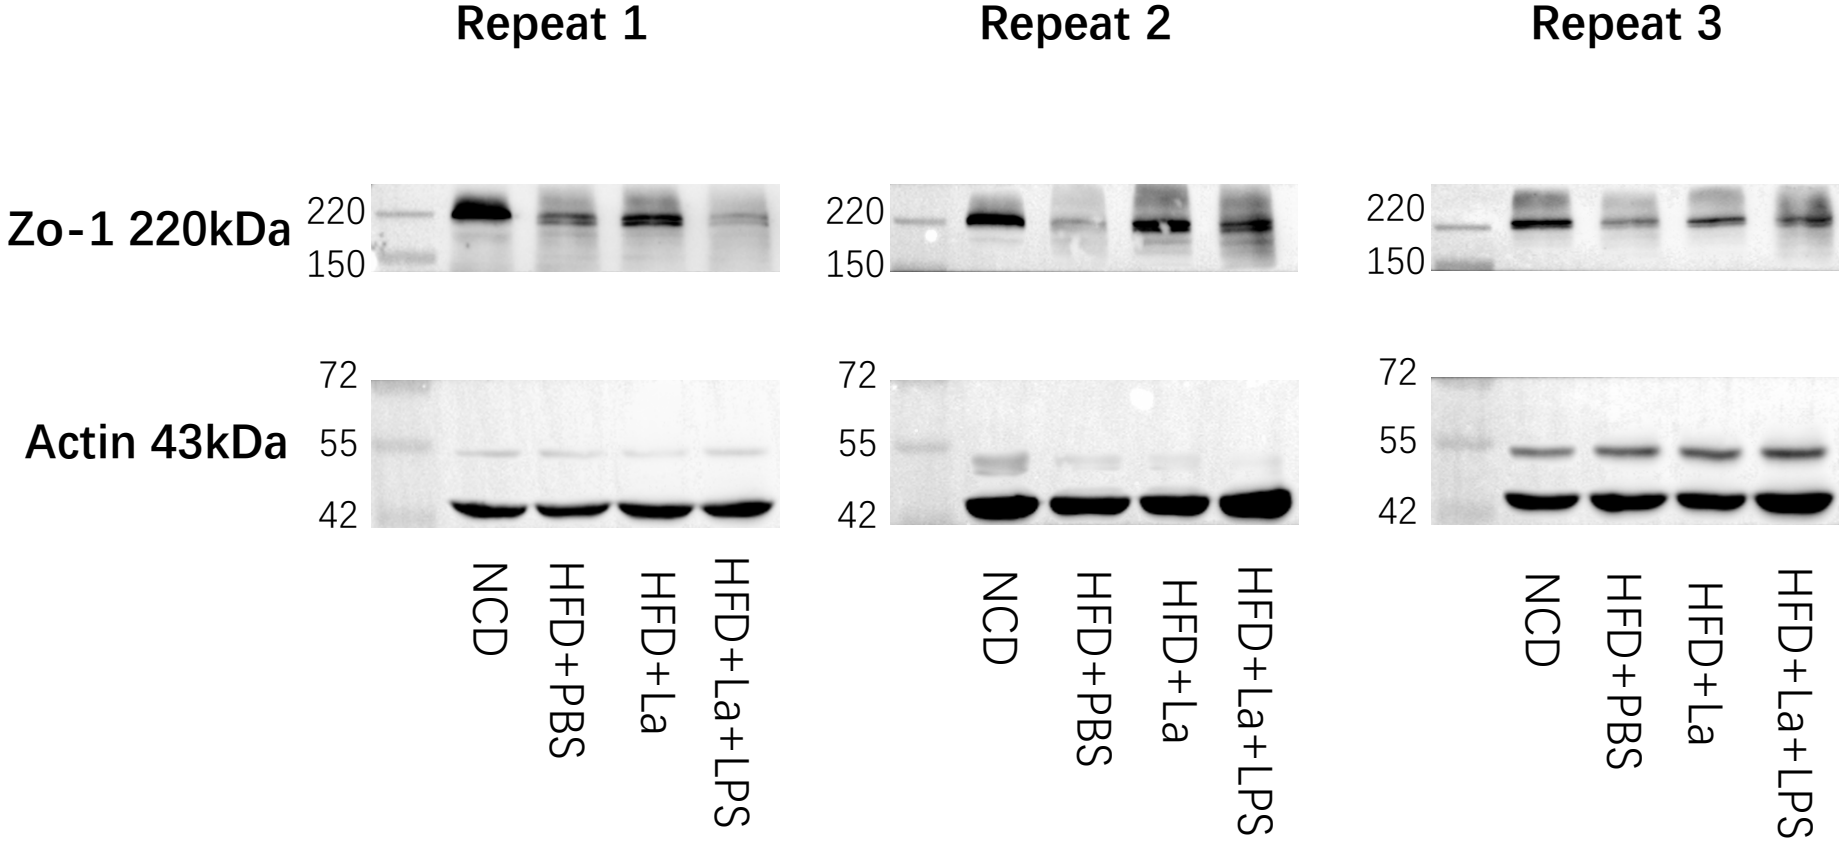

Supplement: msystems.00595-24-s0003.pdf [file msystems.00595-24-s0003.pdf]
